# Supplementary material for: Carbon Nanodisks Decorated with Guanidinylated Hyperbranched Polyethyleneimine Derivatives as Efficient Antibacterial Agents
Source: MDPI journal article supplement (doi:10.3390/nano14080677), 2024-04-13
Supplement: s1 [file s1]

# Carbon nanodisks decorated with guanidinylated hyperbranched polyethyleneimine derivatives as efficient antibacterial agents

Kyriaki-Marina Lyra <sup>1</sup>, Ioannis Tournis<sup>1</sup>, Mohammed Subrati<sup>1</sup>, Konstantinos Spyrou <sup>2</sup>,  
Aggeliki Papavasiliou<sup>1</sup>, Chrysoula P. Athanasekou<sup>1</sup>, Sergios Papageorgiou<sup>1</sup>, Elias Sakellis<sup>1,3</sup>  
Michael A. Karakassides<sup>2</sup> and Zili Sideratou <sup>1\*</sup>

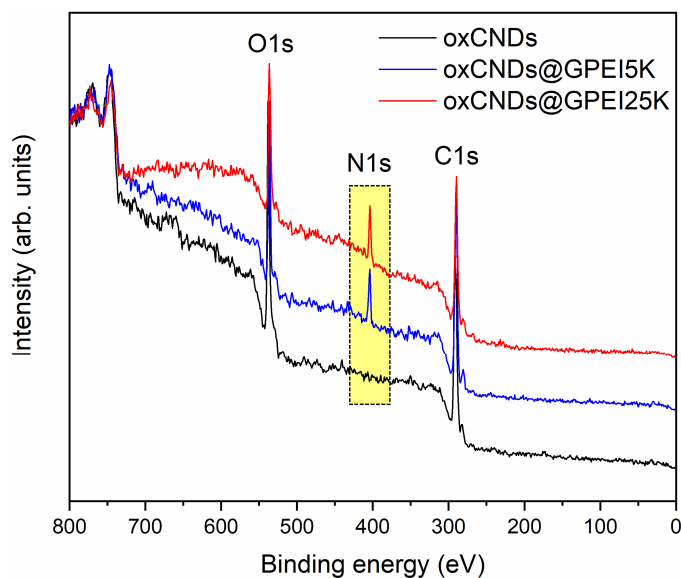

**Figure S1.** XPS survey spectra of oxCNDs, oxCNDs@GPEI5K, and oxCNDs@GPEI25K.

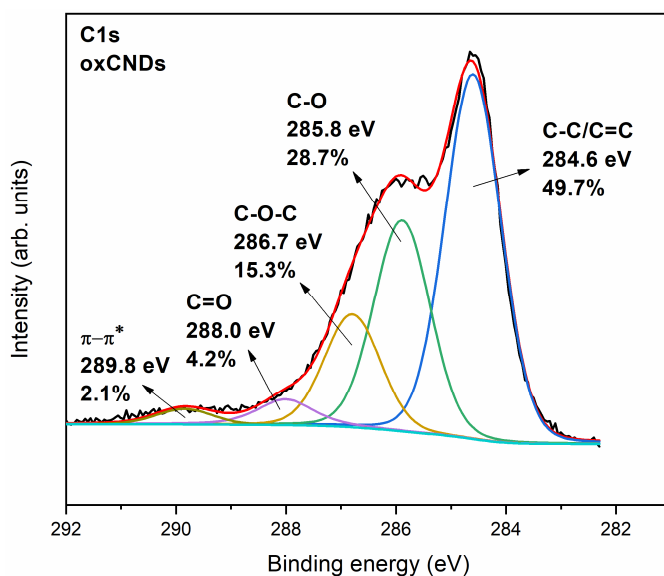

**Figure S2.** Deconvoluted high-resolution core-level C1s spectrum of oxCNDs.

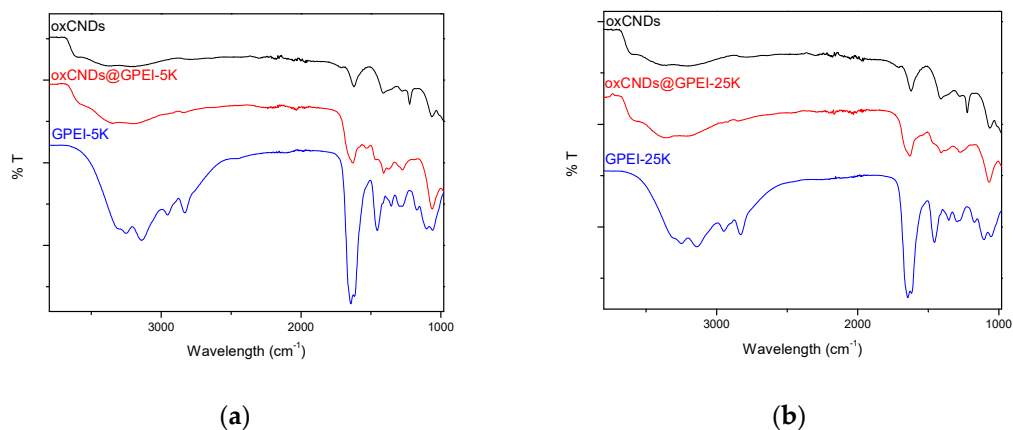

**Figure S3.** FTIR spectra of (a) oxCNDs, GPEI5K and oxCNDs@GPEI5K and (b) oxCNDs, GPEI25K and oxCNDs@GPEI25K.

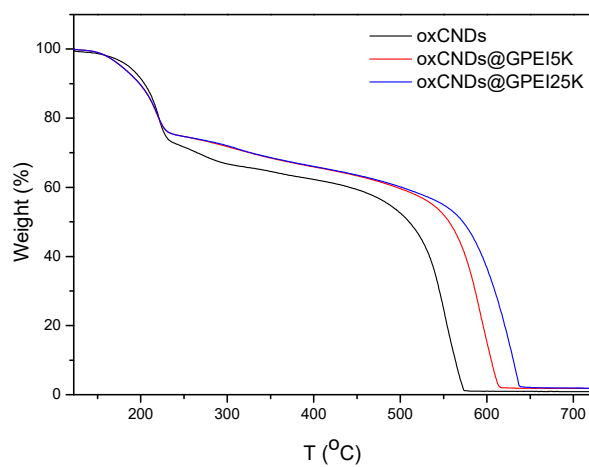

**Figure S4.** Thermogravimetric analysis (TGA) curves of oxCNDs, GPEIs and GPEI-functionalized oxCNDs.

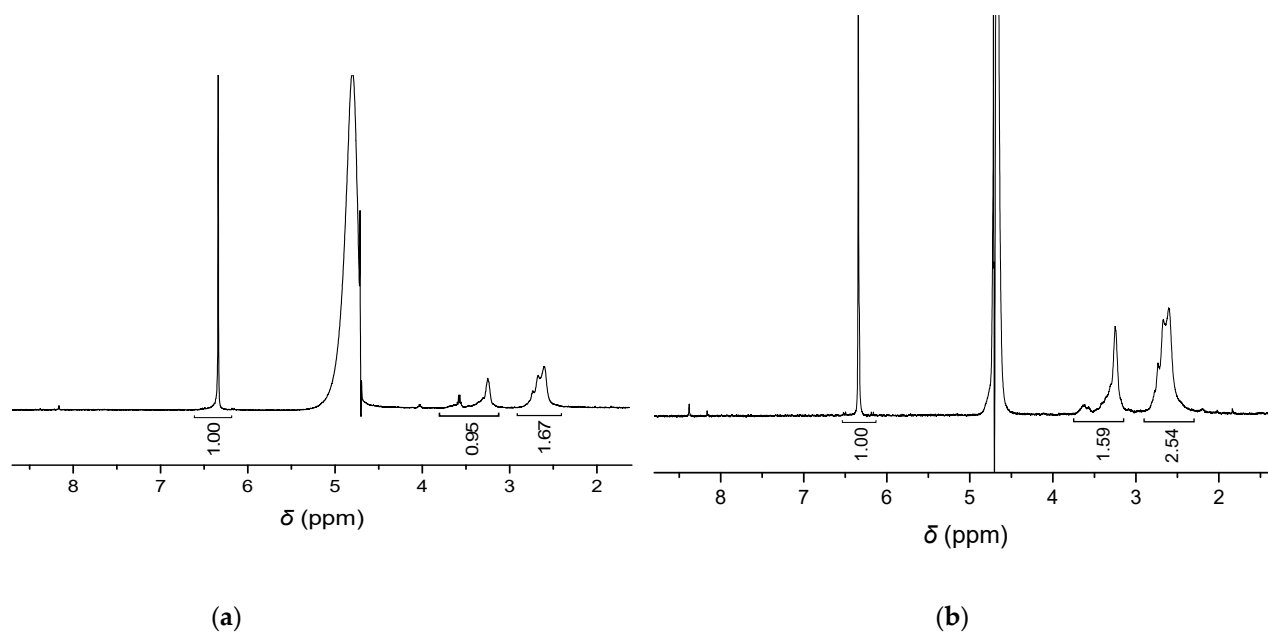

**Figure S5.**  $^1\text{H}$  NMR spectra (500 MHz) of oxCNDs@GPEI5K (a) and oxCNDs@GPEI25K (b) in  $\text{D}_2\text{O}$  containing maleic acid as internal standard.

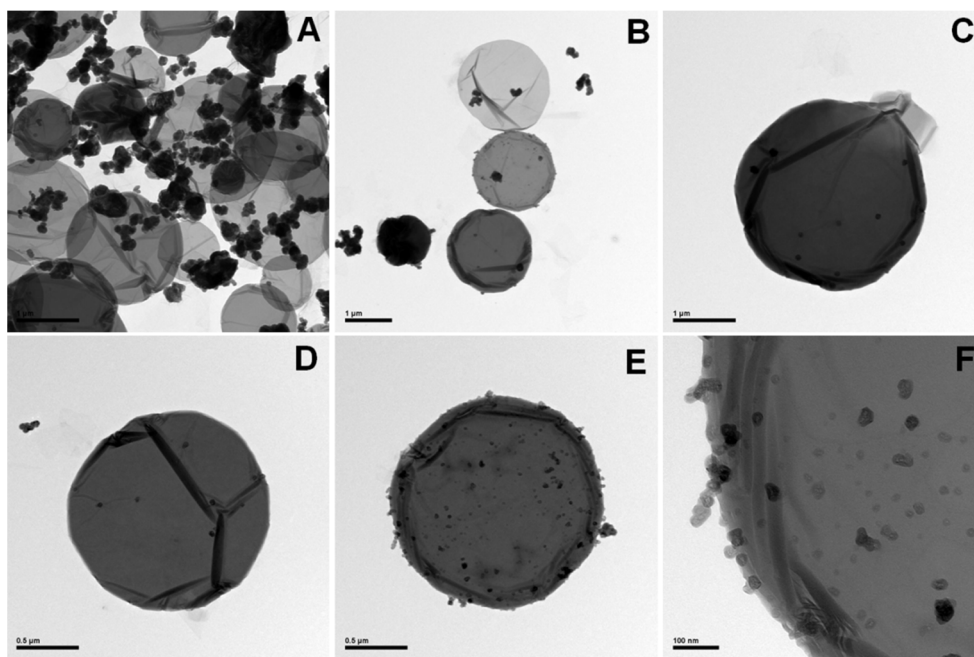

**Figure S6.** TEM images of oxCNDs.

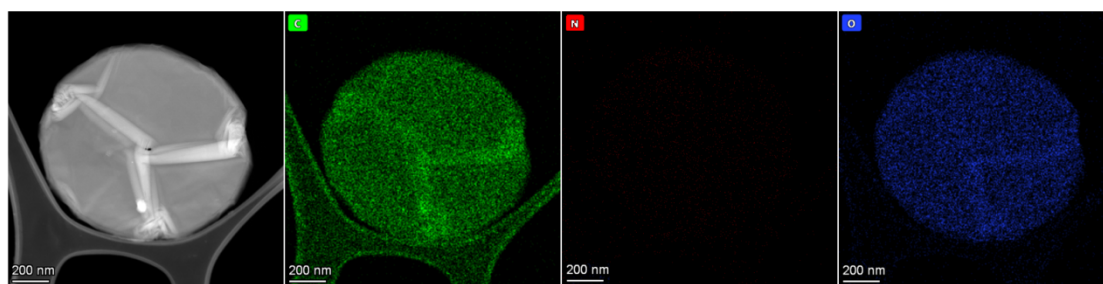

**Figure S7.** Scanning/Transmission Electron Microscopy high angle annular dark field images presenting the oxCNDs morphology, and the corresponding EDS elemental mapping images of C (K edge), N (K edge) and oxygen (K edge).

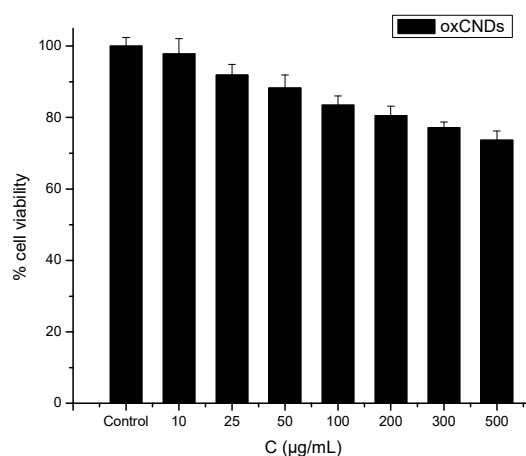

**Figure S8.** Comparative toxicities of the parent oxCNDs on human embryonic kidney HEK293 cells following incubation at various concentrations for 24 hours as determined by MTT assays. Data are expressed as mean  $\pm$  SD of six independent values obtained from at least three independent experiments.

**Table S1.** Lorentzian peak fitting parameters for the first-order Raman bands of CNDs, oxCNDs, oxCNDs@GPEI5K, and oxCNDs@GPEI25K.  $\Delta\tilde{\nu}$  = Raman shift/band position; FWHM = Full width at half maximum;  $I$  = Band intensity.

| Sample         | First-order Raman bands                                                                 |                                                                                        |                                                                                        |                                                                                        |
|----------------|-----------------------------------------------------------------------------------------|----------------------------------------------------------------------------------------|----------------------------------------------------------------------------------------|----------------------------------------------------------------------------------------|
|                | D                                                                                       | D''                                                                                    | G                                                                                      | D'                                                                                     |
| CNDs           | $\Delta\tilde{\nu} = 1355 \text{ cm}^{-1}$<br>FWHM = 34 $\text{cm}^{-1}$<br>$I = 79$    | -                                                                                      | $\Delta\tilde{\nu} = 1583 \text{ cm}^{-1}$<br>FWHM = 21 $\text{cm}^{-1}$<br>$I = 536$  | $\Delta\tilde{\nu} = 1623 \text{ cm}^{-1}$<br>FWHM = 33 $\text{cm}^{-1}$<br>$I = 32$   |
| oxCNDs         | $\Delta\tilde{\nu} = 1347 \text{ cm}^{-1}$<br>FWHM = 116 $\text{cm}^{-1}$<br>$I = 4000$ | $\Delta\tilde{\nu} = 1499 \text{ cm}^{-1}$<br>FWHM = 129 $\text{cm}^{-1}$<br>$I = 662$ | $\Delta\tilde{\nu} = 1571 \text{ cm}^{-1}$<br>FWHM = 61 $\text{cm}^{-1}$<br>$I = 2561$ | $\Delta\tilde{\nu} = 1602 \text{ cm}^{-1}$<br>FWHM = 41 $\text{cm}^{-1}$<br>$I = 2931$ |
| oxCNDs@GPEI5K  | $\Delta\tilde{\nu} = 1347 \text{ cm}^{-1}$<br>FWHM = 112 $\text{cm}^{-1}$<br>$I = 4288$ | $\Delta\tilde{\nu} = 1488 \text{ cm}^{-1}$<br>FWHM = 124 $\text{cm}^{-1}$<br>$I = 611$ | $\Delta\tilde{\nu} = 1573 \text{ cm}^{-1}$<br>FWHM = 59 $\text{cm}^{-1}$<br>$I = 3222$ | $\Delta\tilde{\nu} = 1606 \text{ cm}^{-1}$<br>FWHM = 36 $\text{cm}^{-1}$<br>$I = 2618$ |
| oxCNDs@GPEI25K | $\Delta\tilde{\nu} = 1345 \text{ cm}^{-1}$<br>FWHM = 96 $\text{cm}^{-1}$<br>$I = 3878$  | $\Delta\tilde{\nu} = 1468 \text{ cm}^{-1}$<br>FWHM = 179 $\text{cm}^{-1}$<br>$I = 533$ | $\Delta\tilde{\nu} = 1574 \text{ cm}^{-1}$<br>FWHM = 67 $\text{cm}^{-1}$<br>$I = 2701$ | $\Delta\tilde{\nu} = 1607 \text{ cm}^{-1}$<br>FWHM = 36 $\text{cm}^{-1}$<br>$I = 2065$ |

**Table S2.** Lorentzian peak fitting parameters for the second-order Raman bands of CNDs, oxCNDs, oxCNDs@GPEI5K, and oxCNDs@GPEI25K.  $\Delta\tilde{\nu}$  = Raman shift/band position; FWHM = Full width at half maximum;  $I$  = Band intensity.

| Sample         | Second-order Raman bands                                                                |                                                                                         |                                                                                         |
|----------------|-----------------------------------------------------------------------------------------|-----------------------------------------------------------------------------------------|-----------------------------------------------------------------------------------------|
|                | G' (2D)                                                                                 | D+G (D+D')                                                                              | 2G (2D')                                                                                |
| CNDs           | $\Delta\tilde{\nu} = 2703 \text{ cm}^{-1}$<br>FWHM = 56 $\text{cm}^{-1}$<br>$I = 551$   | -                                                                                       | -                                                                                       |
| oxCNDs         | $\Delta\tilde{\nu} = 2706 \text{ cm}^{-1}$<br>FWHM = 432 $\text{cm}^{-1}$<br>$I = 2385$ | $\Delta\tilde{\nu} = 2924 \text{ cm}^{-1}$<br>FWHM = 220 $\text{cm}^{-1}$<br>$I = 1635$ | $\Delta\tilde{\nu} = 3172 \text{ cm}^{-1}$<br>FWHM = 553 $\text{cm}^{-1}$<br>$I = 2420$ |
| oxCNDs@GPEI5K  | $\Delta\tilde{\nu} = 2688 \text{ cm}^{-1}$<br>FWHM = 225 $\text{cm}^{-1}$<br>$I = 1116$ | $\Delta\tilde{\nu} = 2923 \text{ cm}^{-1}$<br>FWHM = 281 $\text{cm}^{-1}$<br>$I = 2123$ | $\Delta\tilde{\nu} = 3192 \text{ cm}^{-1}$<br>FWHM = 232 $\text{cm}^{-1}$<br>$I = 1052$ |
| oxCNDs@GPEI25K | $\Delta\tilde{\nu} = 2686 \text{ cm}^{-1}$<br>FWHM = 266 $\text{cm}^{-1}$<br>$I = 1072$ | $\Delta\tilde{\nu} = 2928 \text{ cm}^{-1}$<br>FWHM = 218 $\text{cm}^{-1}$<br>$I = 1683$ | $\Delta\tilde{\nu} = 3181 \text{ cm}^{-1}$<br>FWHM = 163 $\text{cm}^{-1}$<br>$I = 739$  |

**Table S3.** Elemental analysis results of oxCNDs, GPEIs and GPEI-functionalized oxCNDs.

| Sample         | Sample elemental composition/wt% |       |       | Polymer content (%<br>w/w) |
|----------------|----------------------------------|-------|-------|----------------------------|
|                | C                                | H     | N     |                            |
| oxCNDs         | 54.08                            | 2.85  | 0.14  |                            |
| GPEI5K         | 34.47                            | 16.98 | 28.17 |                            |
| oxCNDs@GPEI5K  | 52.49                            | 2.43  | 3.96  | 13.63                      |
| GPEI25K        | 36.65                            | 16.30 | 28.55 |                            |
| oxCNDs@GPEI25K | 52.58                            | 3.09  | 4.76  | 16.26                      |
